# Supplementary material for: Establishment of developmental gene silencing by ordered polycomb complex recruitment in early zebrafish embryos
Source: eLife journal article supplement (doi:10.7554/elife.67738), 2022-01-04
Supplement: supp [file elife_poa_e67738_Figure_1_figure_supplement_3.pdf › elife_poa_e67738_Figure_1_figure_supplement_3.pdf]

**A**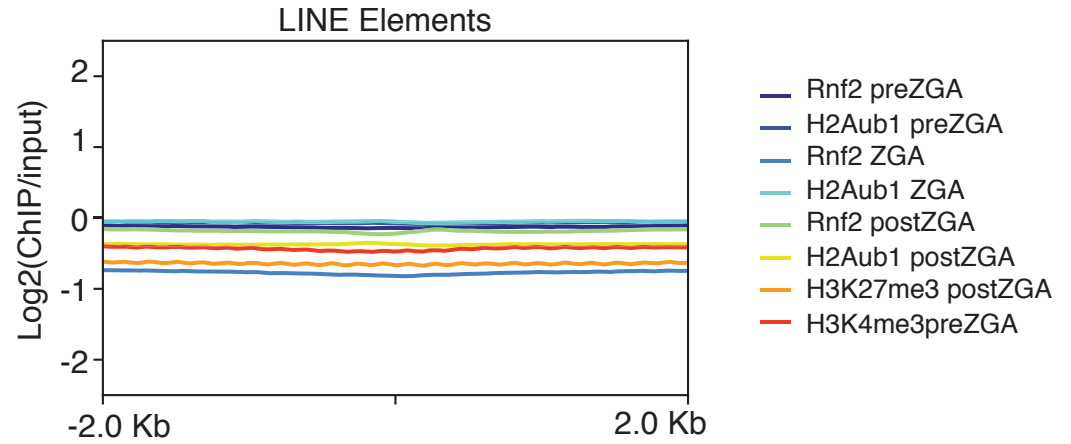**B**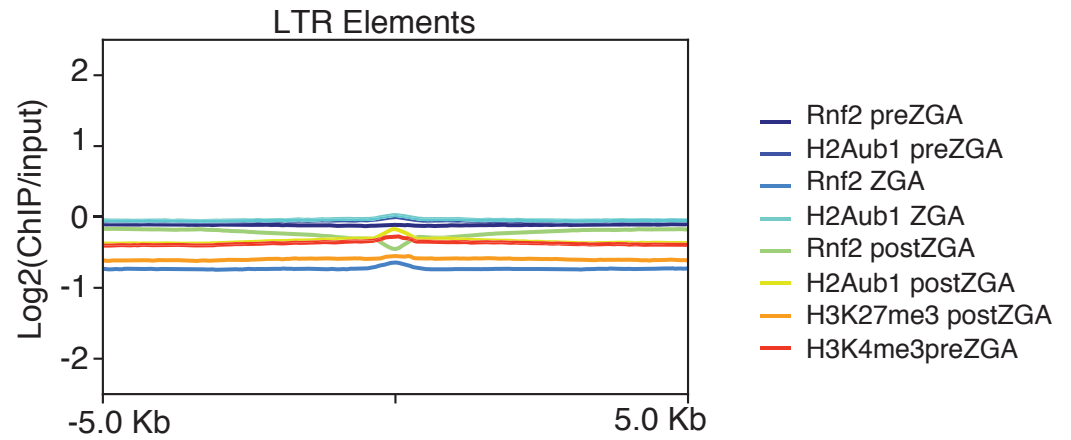**C**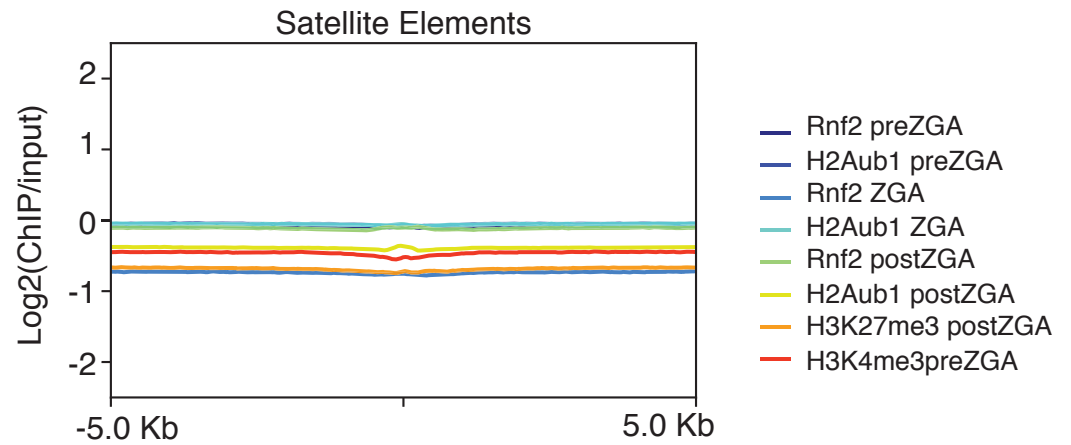

**Figure 1 – figure supplement 3: Rnf2 and H2Aub1 are not enriched at LINE, LTR and Satellite repetitive elements.**
