# Supplementary material for: Establishment of developmental gene silencing by ordered polycomb complex recruitment in early zebrafish embryos
Source: eLife journal article supplement (doi:10.7554/elife.67738), 2022-01-04
Supplement: supp [file elife_poa_e67738_Figure_4_figure_supplement_1.pdf › elife_poa_e67738_Figure_4_figure_supplement_1.pdf]

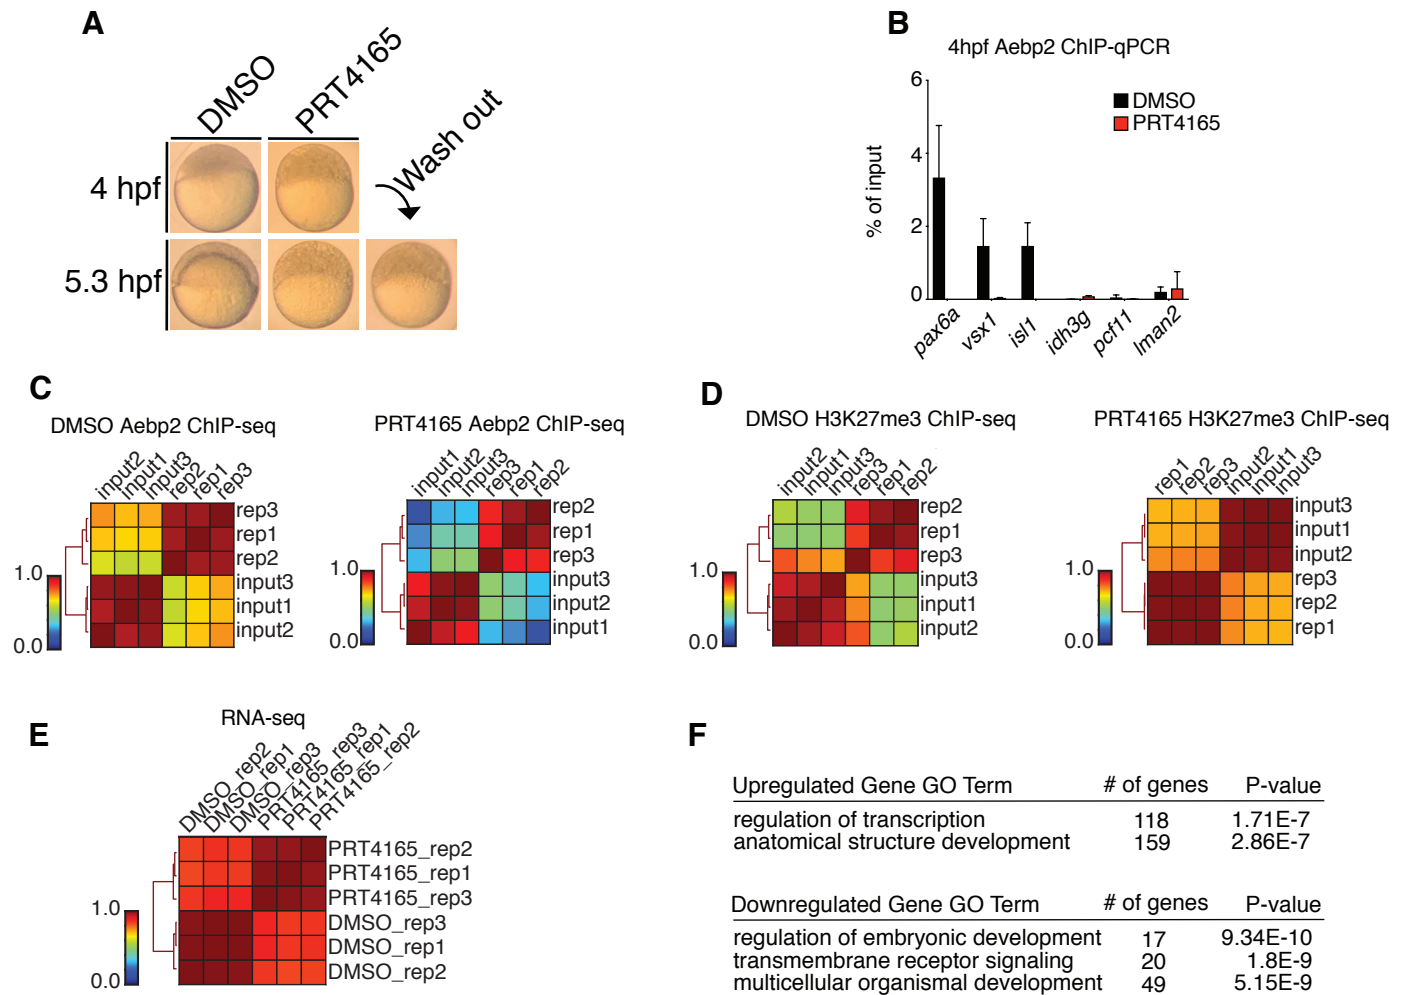

**Figure 4 – figure supplement 1: Replicate structures of ChIP-seq and RNA-seq experiments involving drug treatments.**
