# Supplementary material for: Establishment of developmental gene silencing by ordered polycomb complex recruitment in early zebrafish embryos
Source: eLife journal article supplement (doi:10.7554/elife.67738), 2022-01-04
Supplement: supp [file elife_poa_e67738_Figure_4_figure_supplement_2.pdf › elife_poa_e67738_Figure_4_figure_supplement_2.pdf]

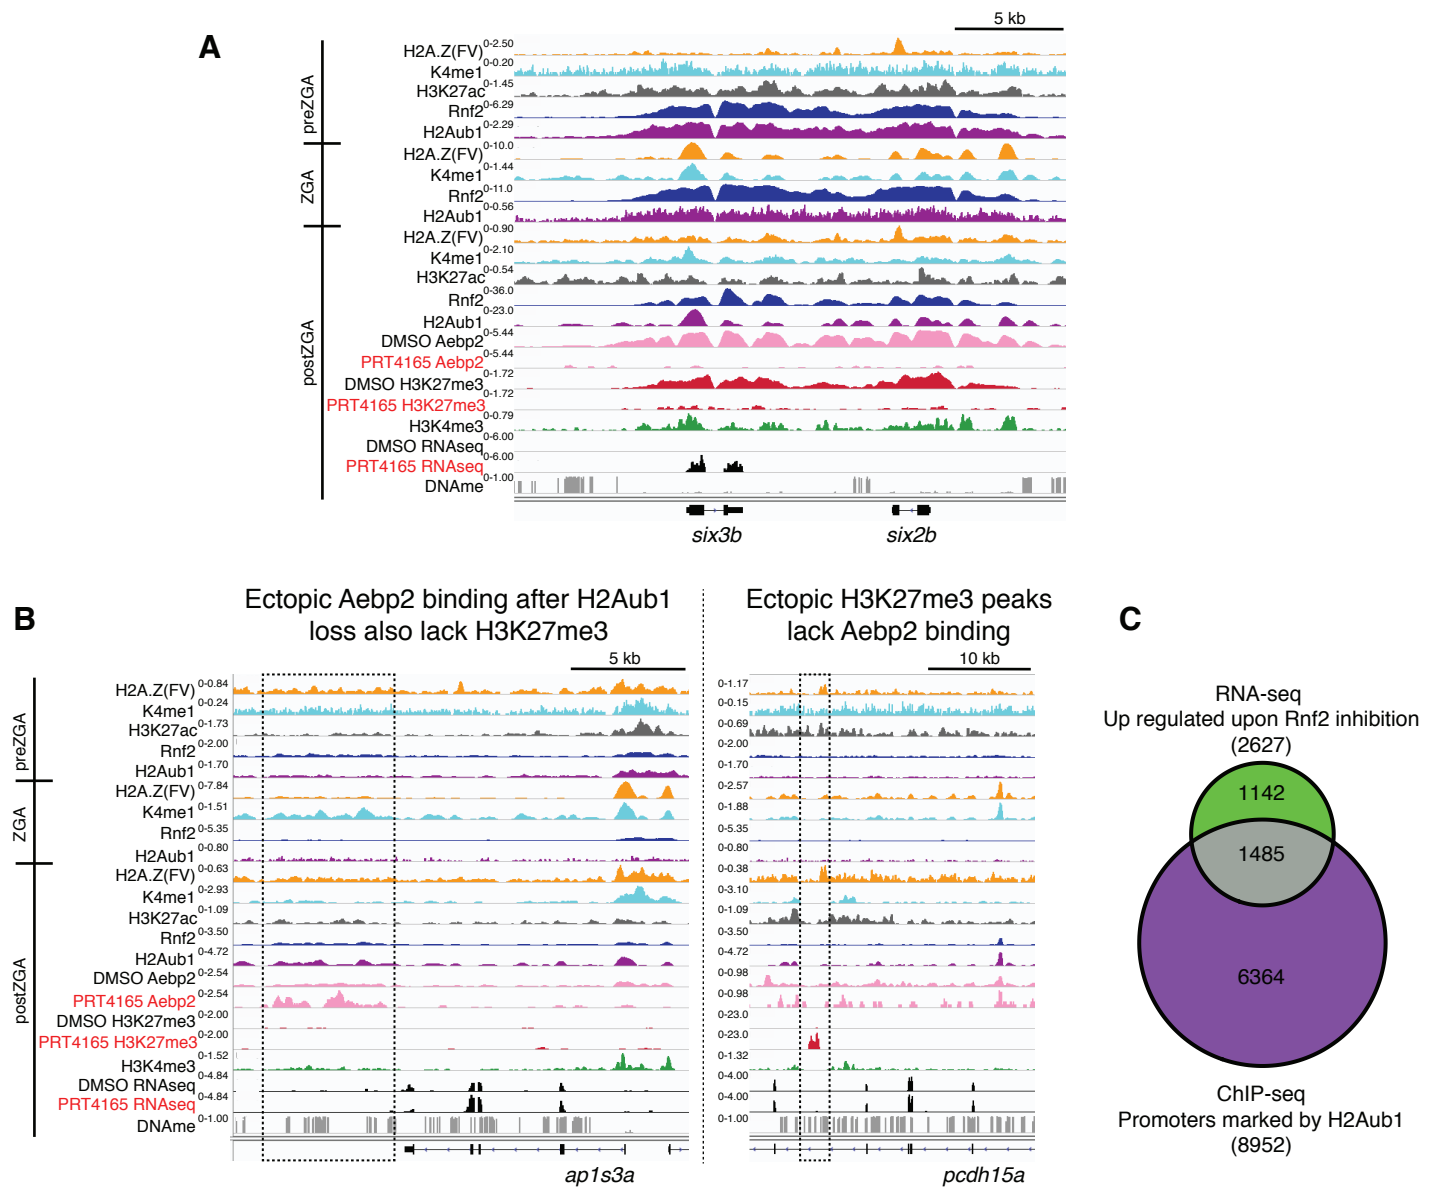

**Figure 4 – figure supplement 2: Loss of H2Aub1 results in disrupted Aebp2 localization, H3K27me3 marking and transcriptional de-repression.**
