# Supplementary material for: Establishment of developmental gene silencing by ordered polycomb complex recruitment in early zebrafish embryos
Source: eLife journal article supplement (doi:10.7554/elife.67738), 2022-01-04
Supplement: supp [file elife_poa_e67738_Figure_4_figure_supplement_3.pdf › elife_poa_e67738_Figure_4_figure_supplement_3.pdf]

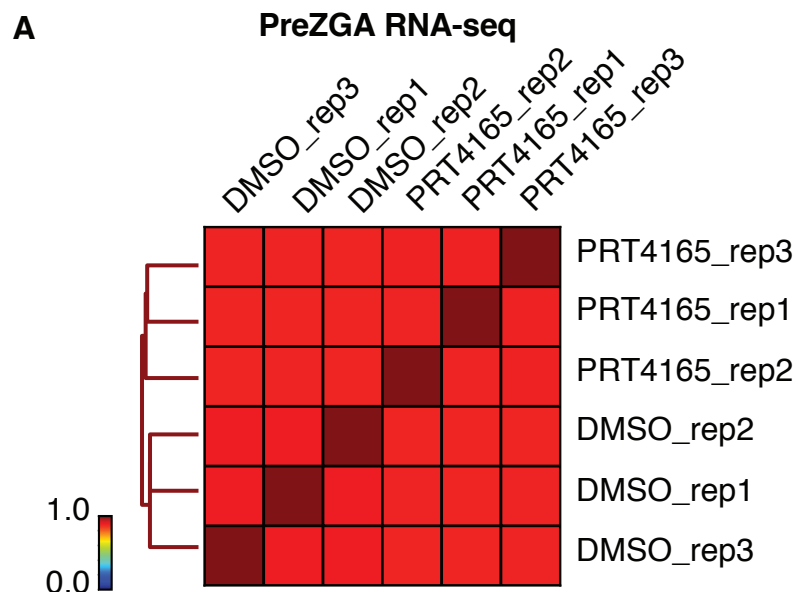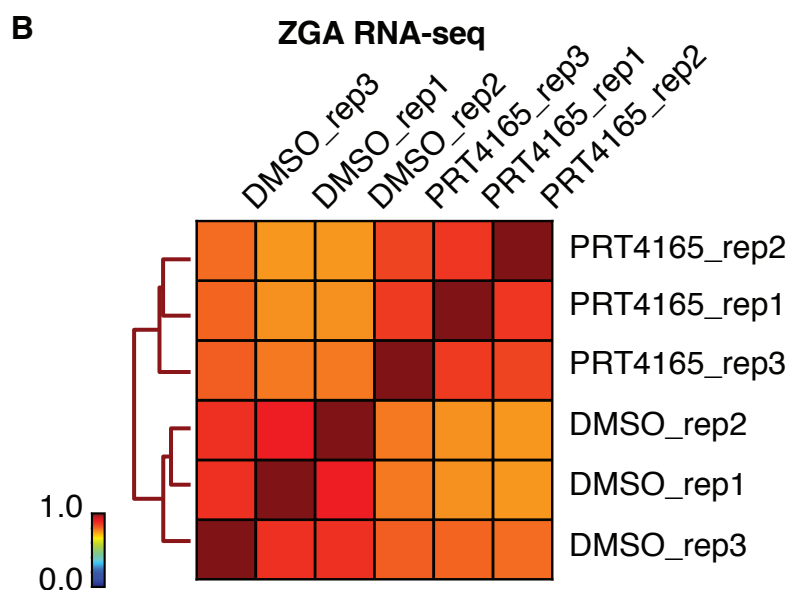

**C**

| Timepoint of upregulation | GO Term                | # of genes | P-value |
|---------------------------|------------------------|------------|---------|
| 2.5 hpf (preZGA)          | RNA recognition motif  | 69         | 4.9E-20 |
|                           | RNA nucleotide binding | 80         | 3.2E-19 |
|                           | Spliceosome            | 48         | 8.8E-12 |
| 3.5 hpf (ZGA)             | Ribonucleoprotein      | 107        | 3.3E-29 |
|                           | RNA nucleotide binding | 139        | 4.6E-28 |
|                           | RNA recognition motif  | 112        | 4.9E-25 |

**Figure 4 – figure supplement 3: RNAseq of PRT4165 treated embryos at preZGA and ZGA.**
