# Supplementary figures and images for: Establishment of developmental gene silencing by ordered polycomb complex recruitment in early zebrafish embryos
Source: eLife journal article supplement (doi:10.7554/elife.67738), 2022-01-04

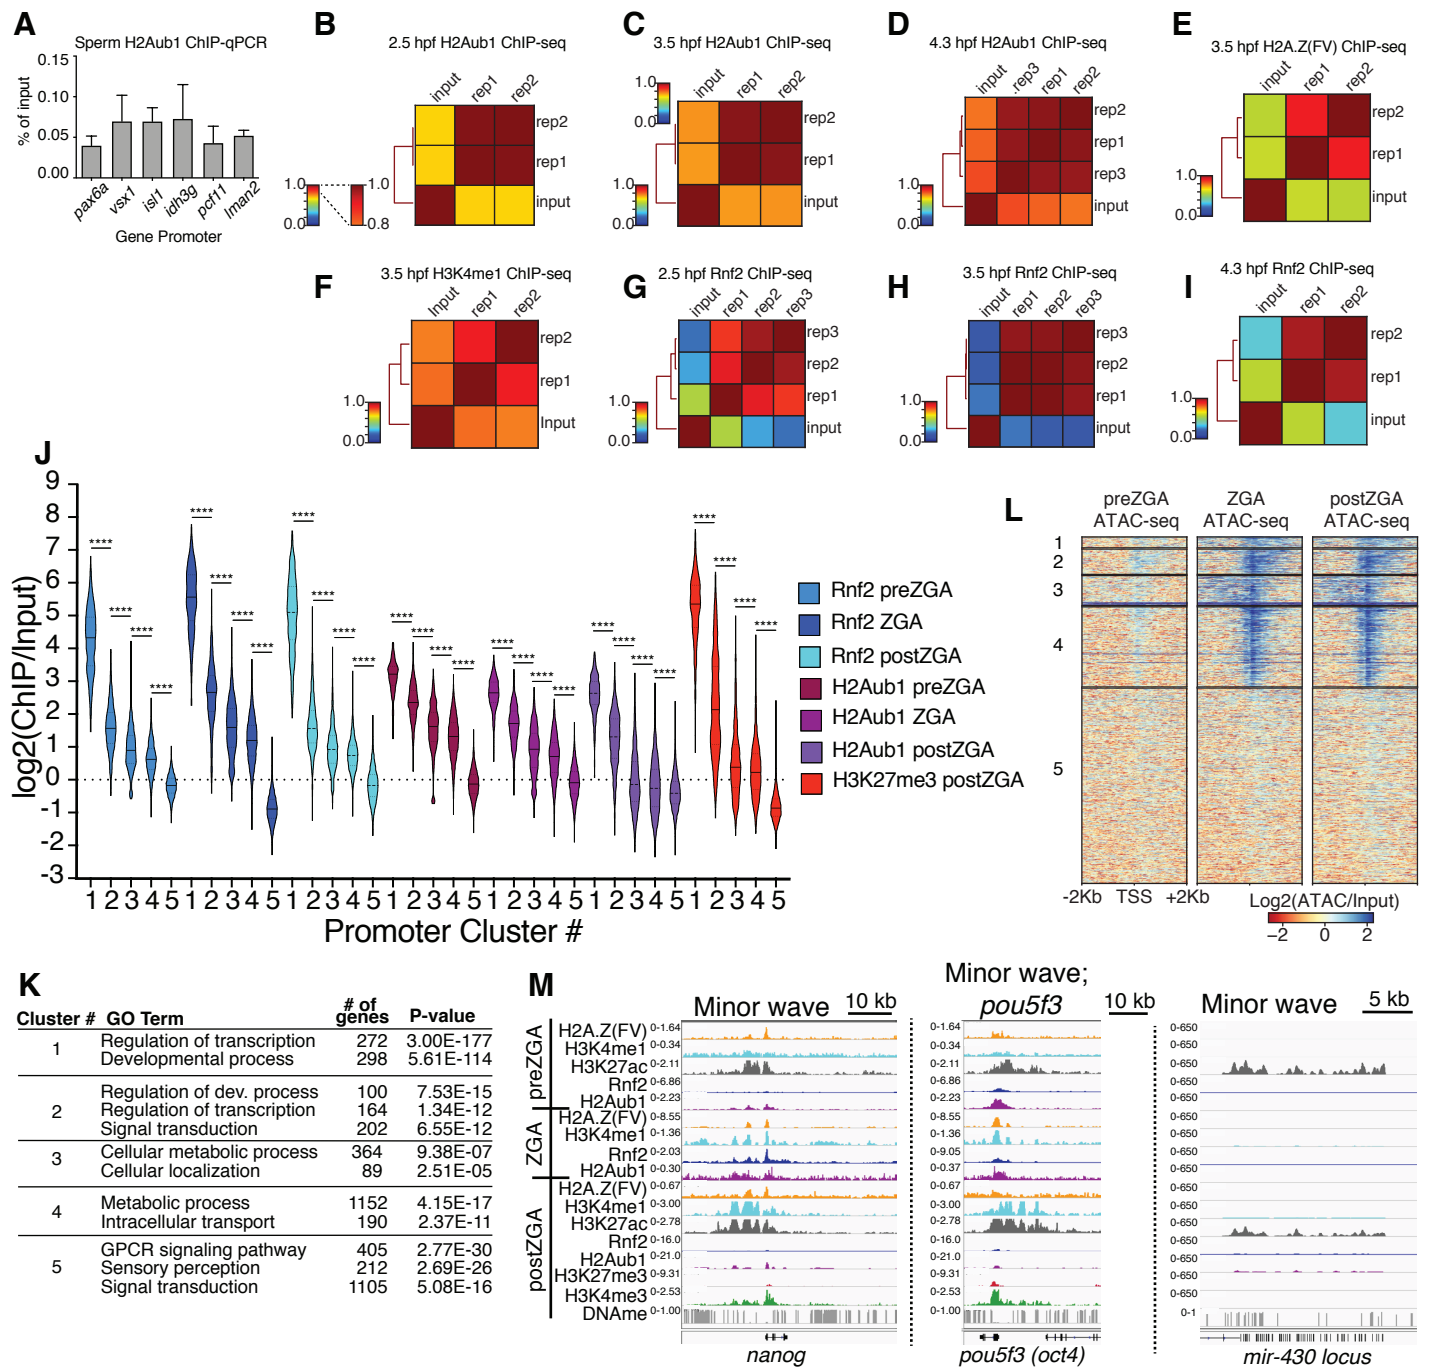

Figure 1 – figure supplement 2: ChIP replicate structures & additional analyses.

Supplement: supp [file elife_poa_e67738_Figure_1_figure_supplement_2.pdf › elife_poa_e67738_Figure_1_figure_supplement_2.pdf]

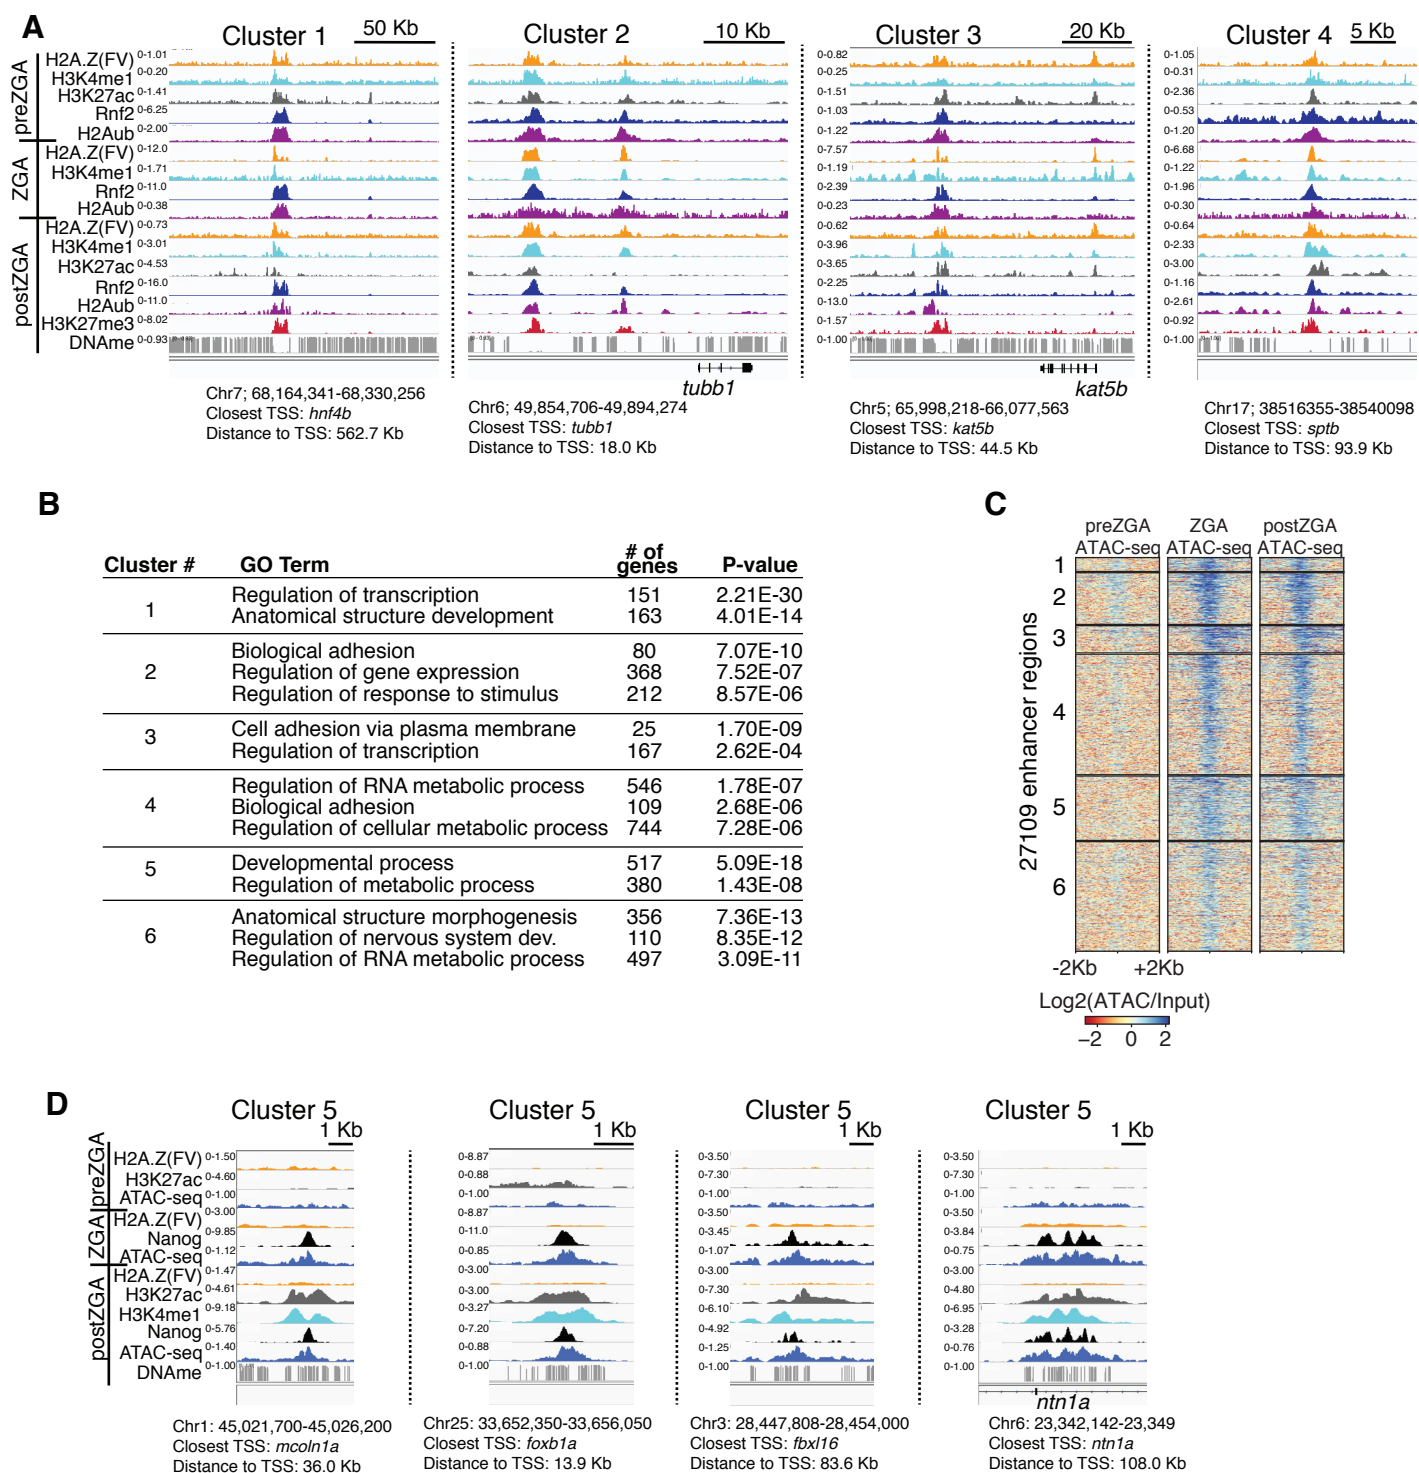

**Figure 2 – figure supplement 1: Additional examples of ChIP enrichment at enhancers.**

Supplement: supp [file elife_poa_e67738_Figure_2_figure_supplement_1.pdf › elife_poa_e67738_Figure_2_figure_supplement_1.pdf]

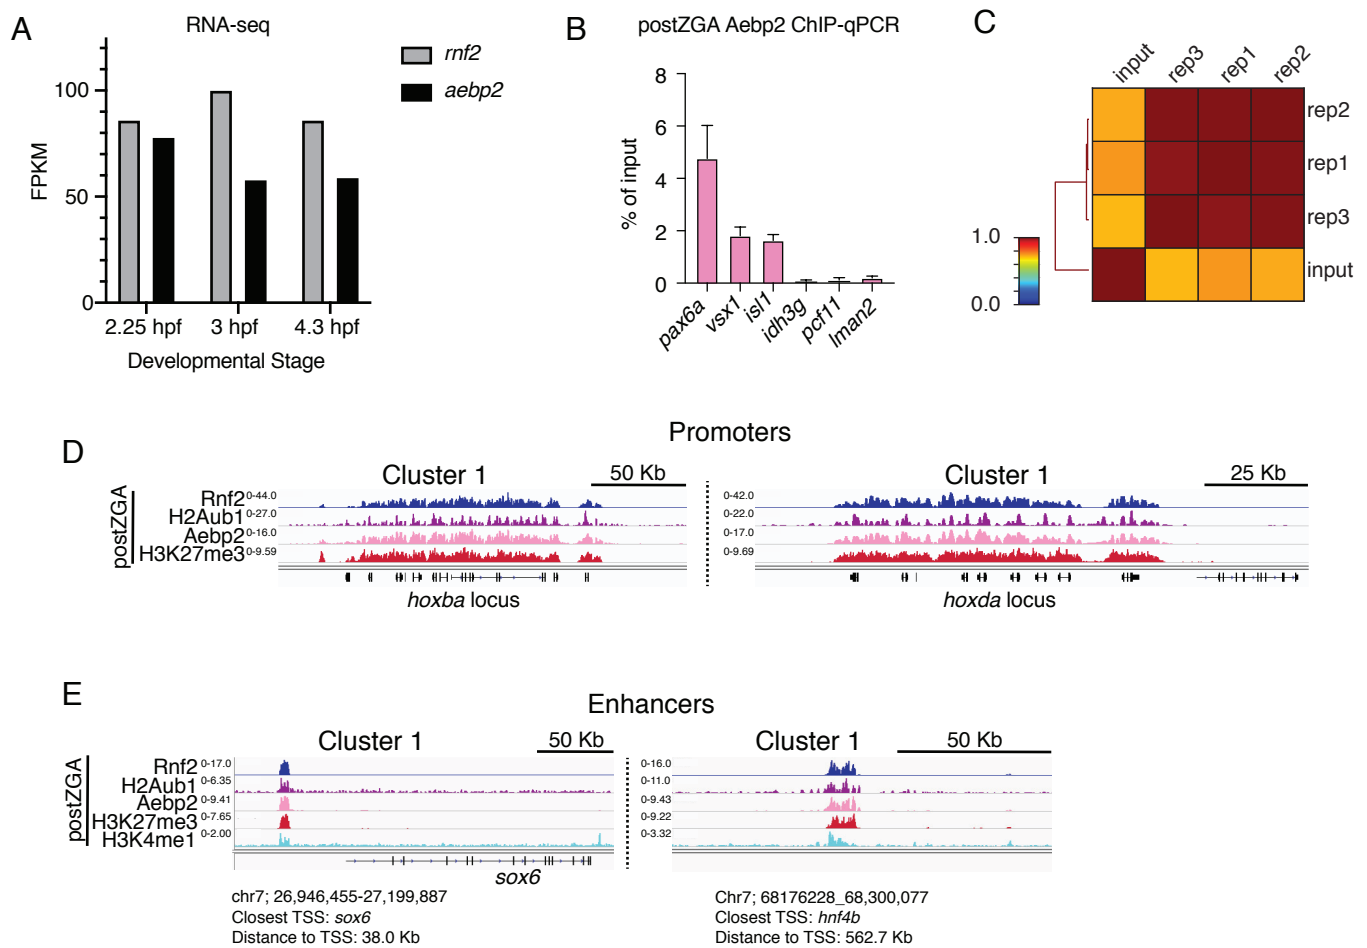

**Figure 3 – figure supplement 1: ChIP profiling of Aebp2 in postZGA embryos.**

Supplement: supp [file elife_poa_e67738_Figure_3_figure_supplement_1.pdf › elife_poa_e67738_Figure_3_figure_supplement_1.pdf]

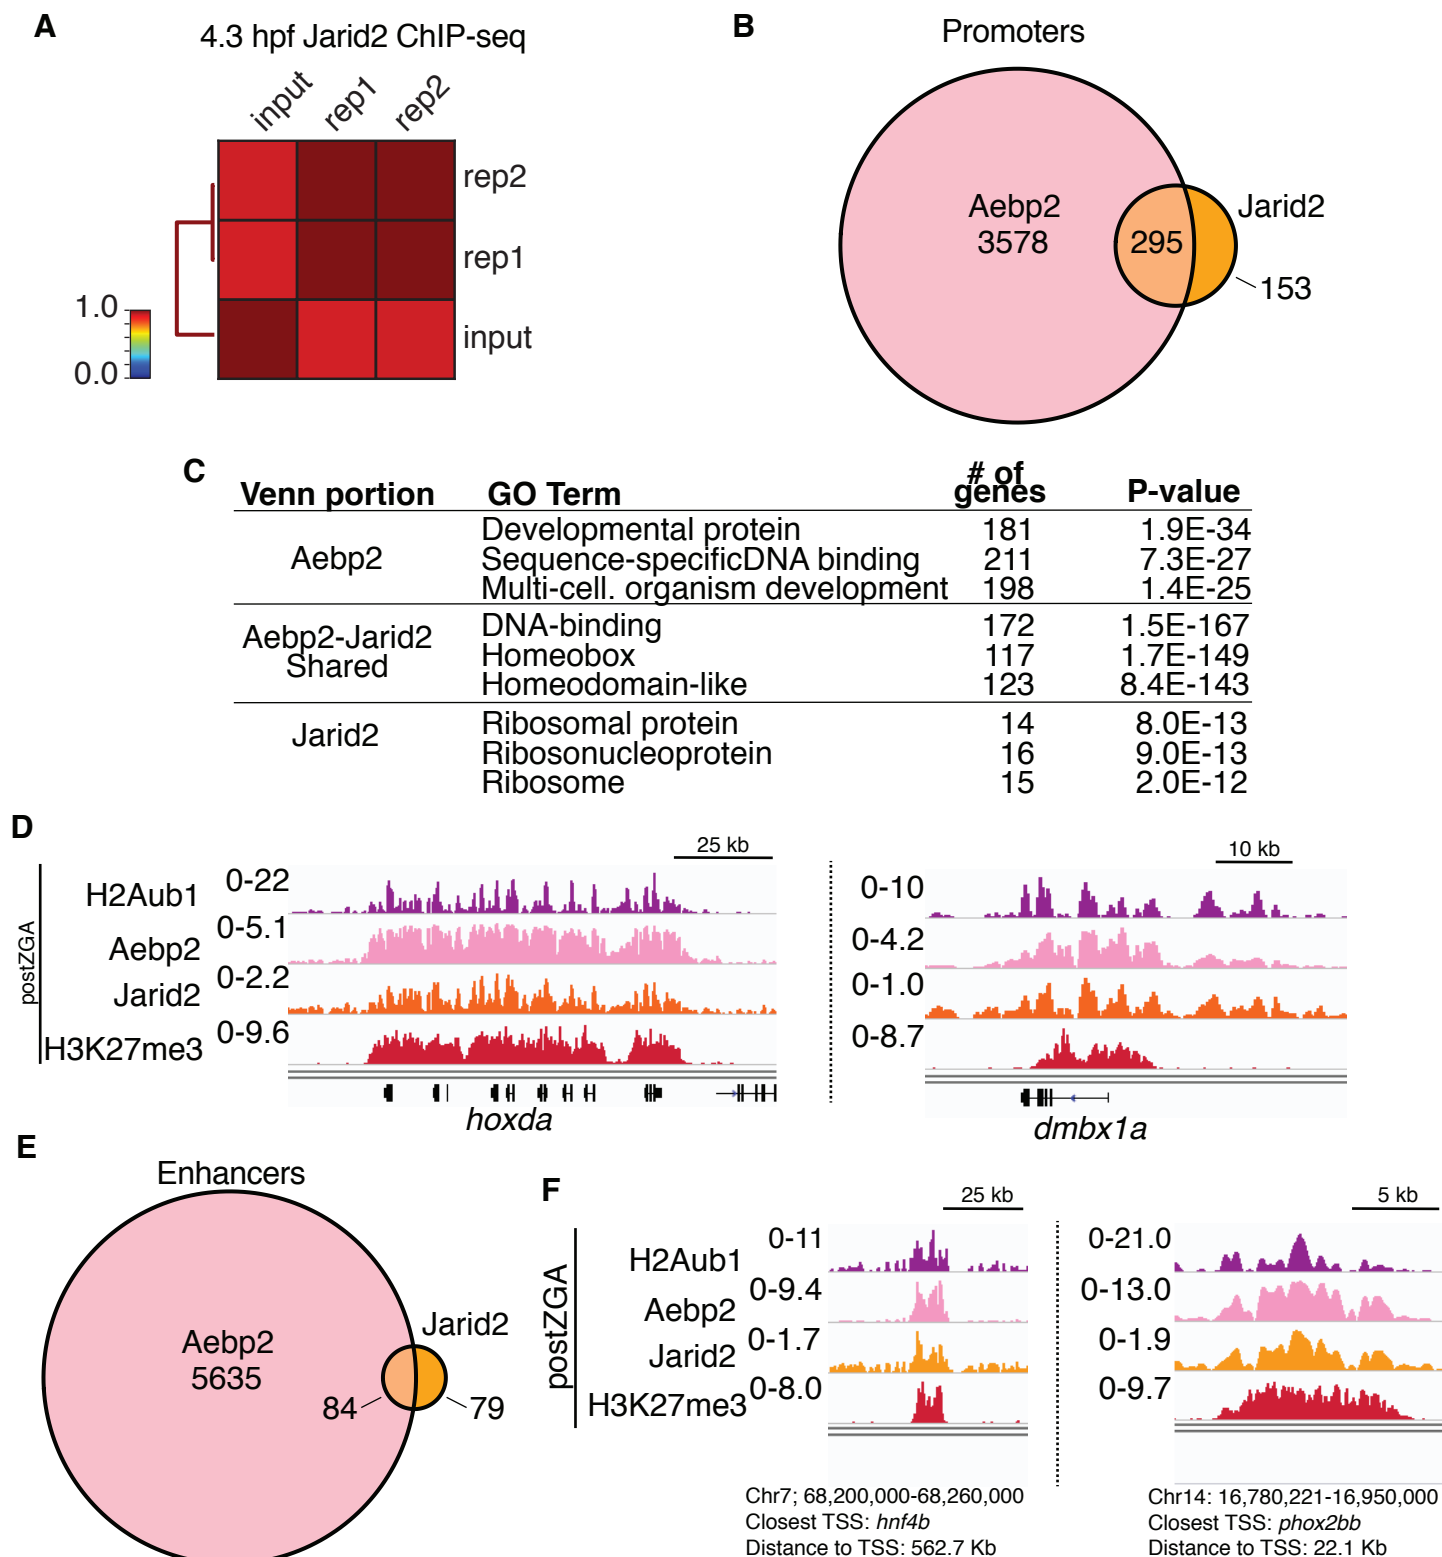

Figure 3 – figure supplement 2: PostZGA ChIP-seq of Jarid2.

Supplement: supp [file elife_poa_e67738_Figure_3_figure_supplement_2.pdf › elife_poa_e67738_Figure_3_figure_supplement_2.pdf]
